# Supplementary material for: Innate Immune Basis for Rift Valley Fever Susceptibility in Mouse Models
Source: PubMed Central journal article supplement (PMC5541133; doi:10.1038/s41598-017-07543-8), 2017-08-02
Supplement: 41598_2017_7543_MOESM1_ESM.pdf [file 41598_2017_7543_MOESM1_ESM.pdf]

# **SUPPLEMENTARY INFORMATION**

## **Innate Immune Basis for Rift Valley Fever Susceptibility in Mouse Models**

Rashida Lathan, Dominique Simon-Chazottes, Grégory Jouvion, Ophélie Godon,  
Marie Malissen, Marie Flamand, Pierre Bruhns & Jean-Jacques Panthier

## **Supporting information Captions**

**Supplementary Figure 1. The liver exhibits the highest percentages of cells positive for the RVFV N antigen (N-ag).** Percentages of N-ag-positive cells in the blood (n=8), spleen (n=26), and liver (n=15) cells of BALB/c mice at day 3 post infection. Data are represented as mean  $\pm$  SEM. Groups were analyzed with two-way ANOVA. \*\*p <0.01, n.s. means non-significant.

**Supplementary Figure 2. The decreased cell viability of cells in the spleen of MBT compared to BALB/c mice is not due to caspase-3- dependent apoptosis.** Percentages of caspase-3-positive cells in the spleen of RVFV-infected BALB/c and MBT mice at day 3 post infection. Cytometry experiments were performed twice, n=5 mice/strain/timepoint. Data are represented as mean  $\pm$  SEM. Groups were analyzed with two-way ANOVA. n.s. means non-significant.

**Supplementary Figure 3. Differences were not found between other innate immune cells subsets in RVFV-infected BALB/c and MBT mice.** Flow cytometric profiling of CD4 T-cells (CD45+, CD3+, CD4+), CD8 T-cells (CD45+, CD3+, CD8+), macrophages (CD45+, CD11b+), and B-cells (CD45+, CD19+) in the spleen (**a**) and liver (**b**) of RVFV-infected BALB/c and MBT mice on day 3 post infection. Cytometry experiments were performed 2 times (n=3-5 mice/strain). Data are represented as mean  $\pm$  SEM. A Mann-Whitney U test was used to determine differences between means, n.s. means non-significant.

**Supplementary Figure 4. Characterization of IFN- $\gamma$  expression in neutrophils.** Percentages of IFN- $\gamma$ -positive neutrophils in the blood, spleen and liver of BALB/c and MBT mice at day 3 post infection as determined by intracellular staining in flow cytometry. Experiments were performed 2 times (n=5 mice/strain). Data are

represented as mean  $\pm$  SEM. Mann-Whitney U test was used to determine differences between means, n.s. means non-significant.

**Supplementary Figure 5. Recruitment of neutrophils following sterile inflammation.** Absolute number of neutrophils in the peritoneal space of BALB/c and MBT mice 48 hours after stimulation with thioglycollate. Experiments were performed 2 times (n=5 mice/strain). Data are represented as mean  $\pm$  SEM. Mann-Whitney U test was used to determine differences between means, n.s. means non-significant.

**Supplementary Figure 6. Constitutive neutropenia has not effect on survival of infected mutant and wild type C57BL/6 mice. (a)** Survival curves of *Gfi1*<sup>GFP/GFP</sup> and *Gfi1*<sup>+GFP</sup> C57BL/6 mice following infection with RVFV. **(b)** Survival curves of *Genista* C57BL/6 (n=6), wild-type C57BL/6 (n=6), BALB/c (n=30), and MBT (n=27) mice following infection with RVFV. Mantel-Cox's Logrank test was performed to assess survival curve differences.

**Supplementary Figure 7. Typical gating scheme used to identify immune cell subpopulations.** Example of neutrophils (Ly6CG+) that were positive for PSGL-1 (CD162), taken from a BALB/c mouse at day 1 post infection. Each sample consisted of at least 200,000 viable cells (FSC  $\times$  SSC gated and viability e780 negative). All analyzed leukocytes were CD45+. Gating was determined by both single-stained control, and fluorescence minus one control.

**Supplementary Table 1.** Antibodies used for staining.

Supplementary Figure 1

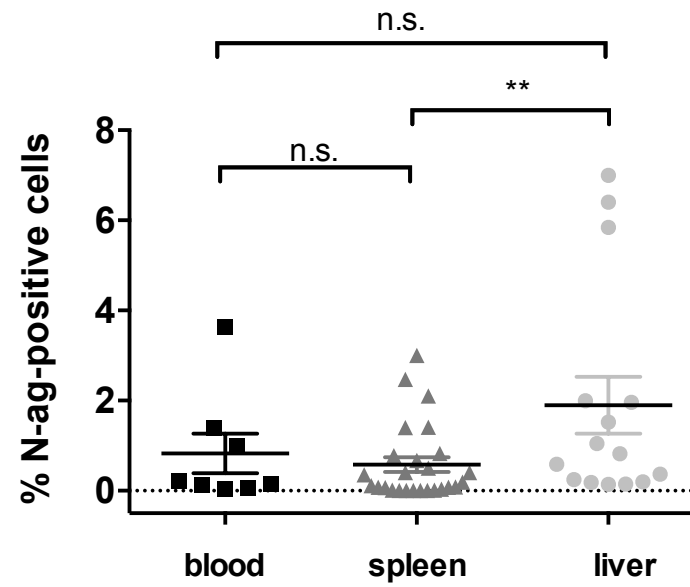

The liver exhibits the highest percentages of cells positive for the RVFV N antigen (N-ag).

Supplementary Figure 2

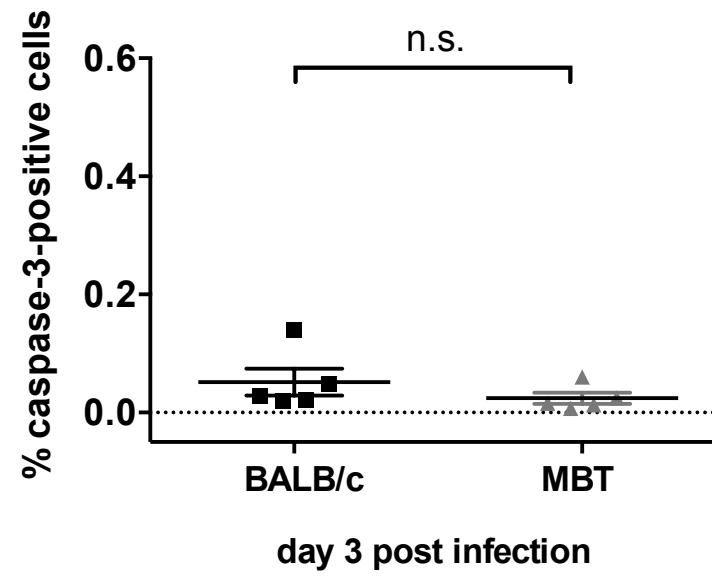

The decreased cell viability of cells in the spleen of MBT compared to BALB/c mice is not due to caspase-3- dependent apoptosis.

## Supplementary Figure 3

**a**

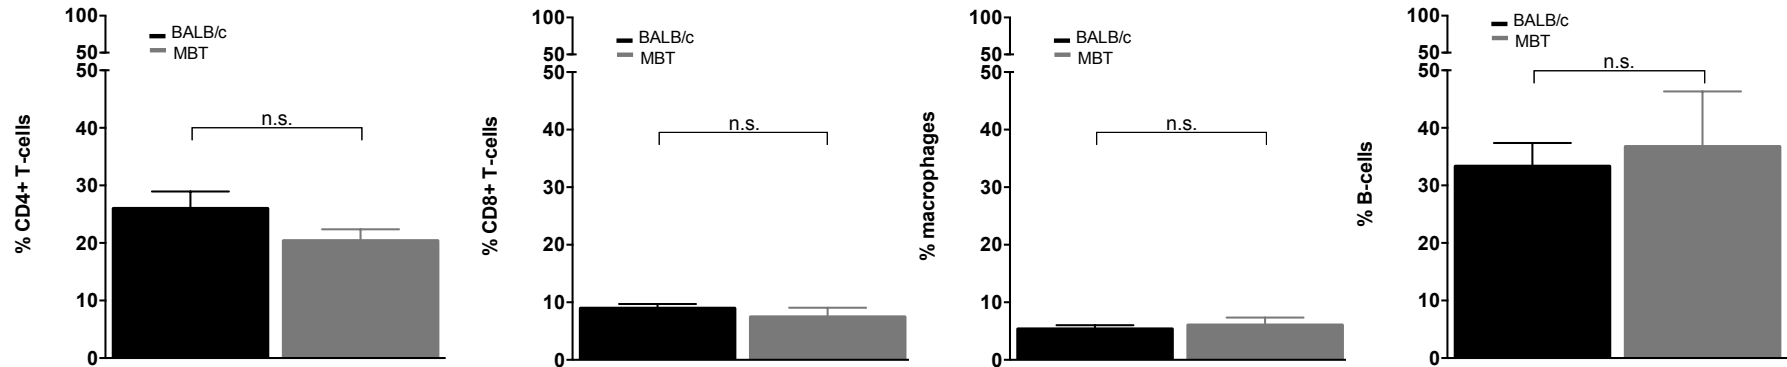

**b**

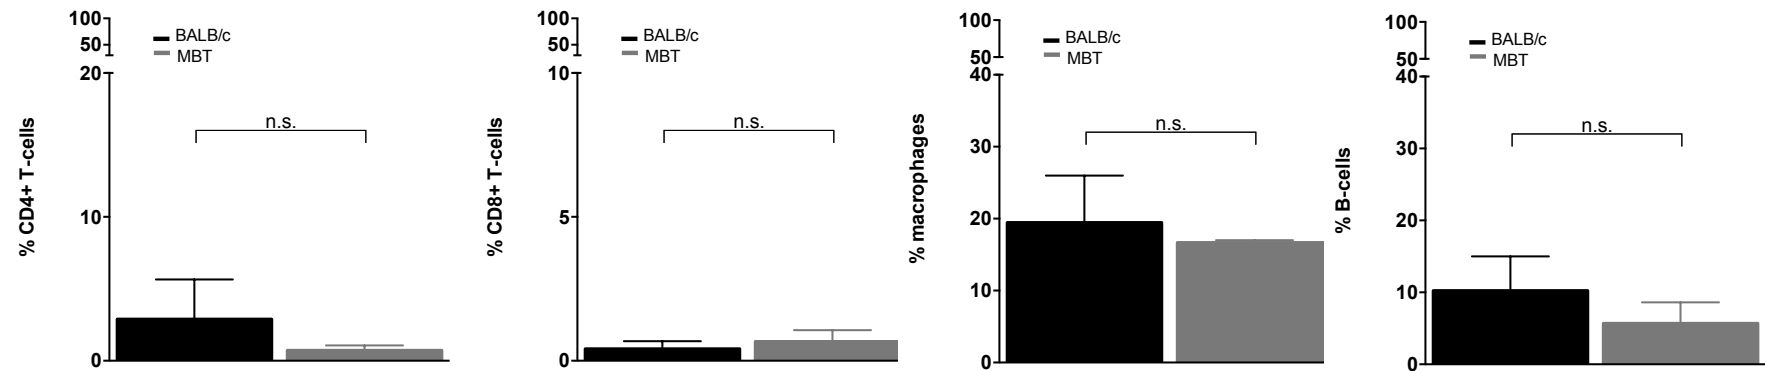

Differences were not found between other innate immune cells subsets in RVFV-infected BALB/c and MBT mice.

## Supplementary Figure 4

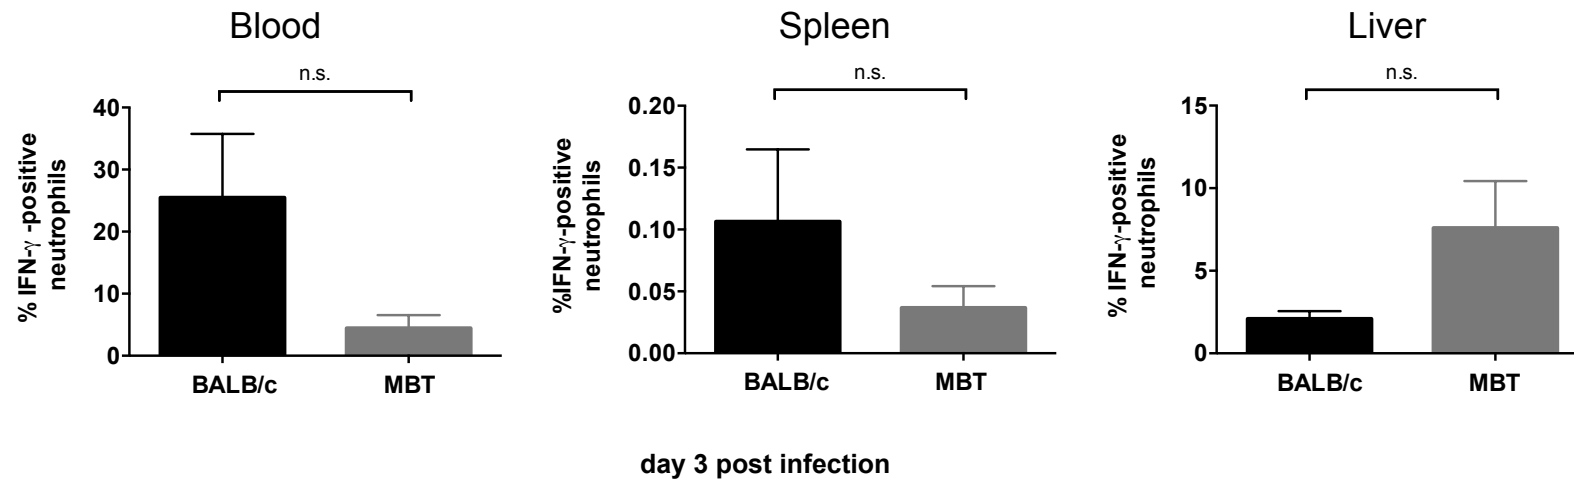

Characterization of IFN- $\gamma$  expression in neutrophils.

## Supplementary Figure 5

Recruitment of neutrophils following sterile inflammation.

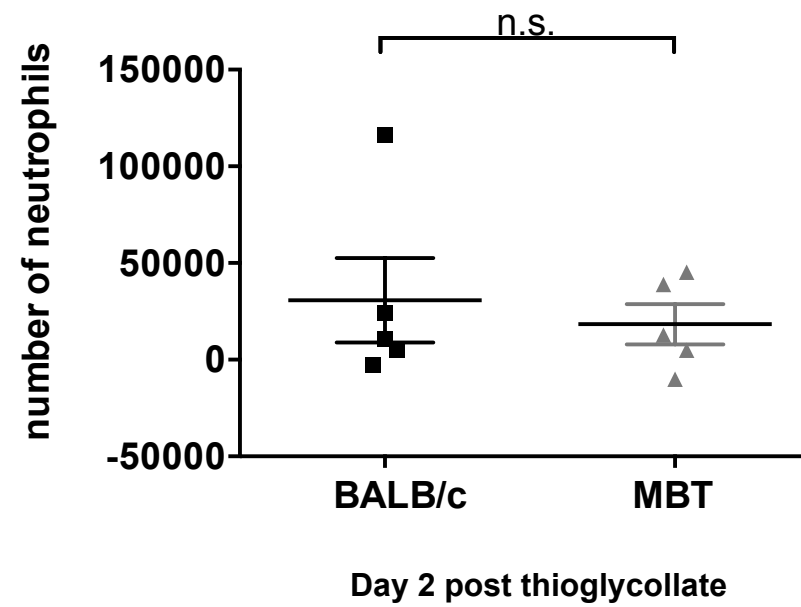



## Supplementary Figure 6

**a**

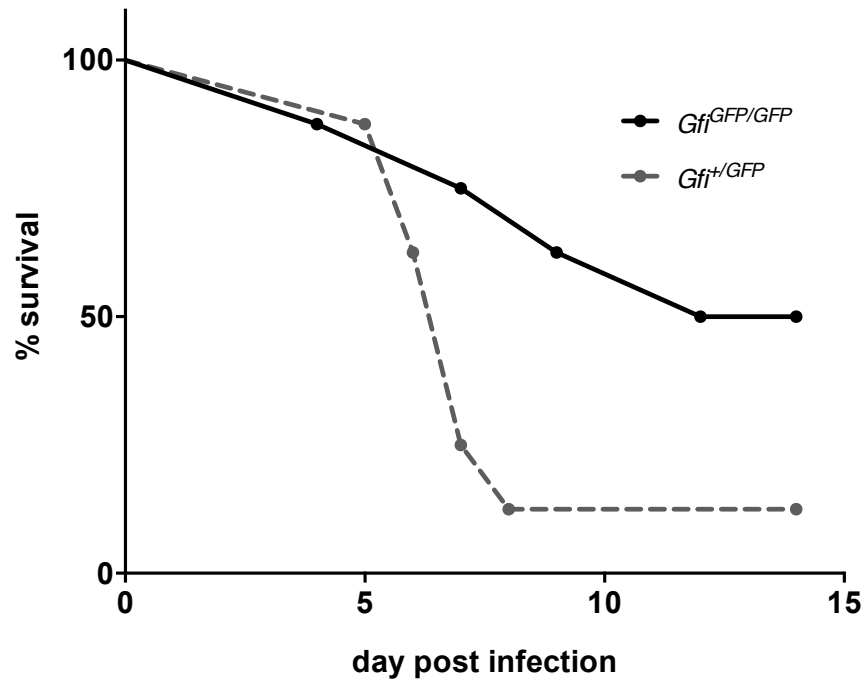

**b**

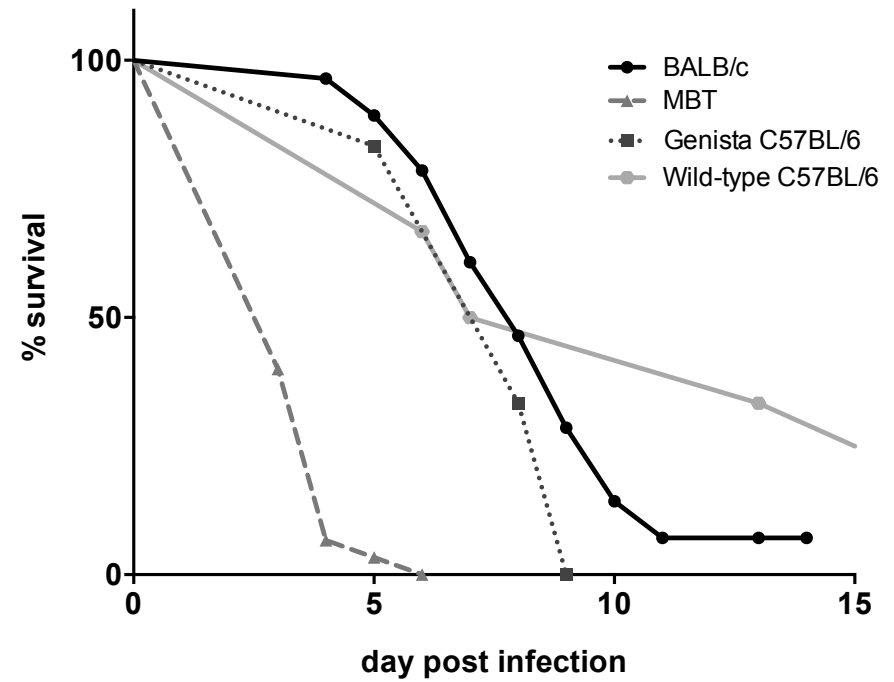

Constitutive neutropenia has not effect on survival of infected mutant and wild type C57BL/6 mice.

## Supplementary Figure 7

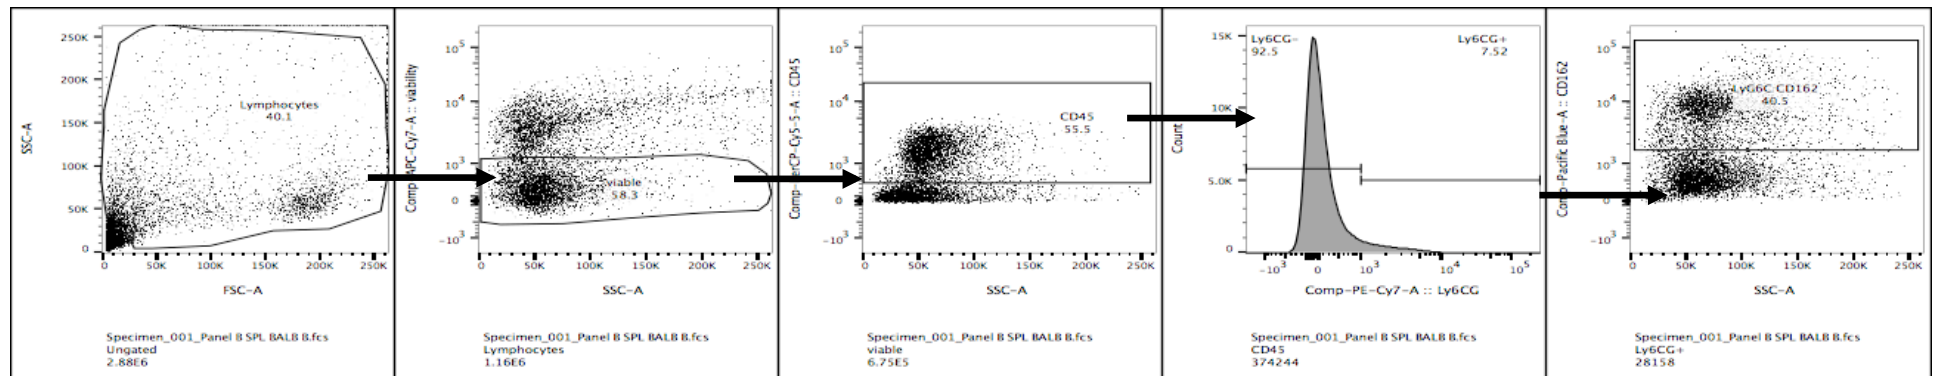

Typical gating scheme used to identify immune cell subpopulations.

**S1 Table. Antibodies used for staining.**

| Antibody                       | Target Epitope/Cells                      | Fluorochrome             | Clone            | Manufacturer                |
|--------------------------------|-------------------------------------------|--------------------------|------------------|-----------------------------|
| CD45                           | Leukocytes                                | PerCP-Cy5.5, PE-Cy7      | 30-F11           | BD Biosciences              |
| CD335                          | NK cells                                  | PE, BV421                | 29A1.4           | BD Biosciences              |
| Ly6G/Ly6C                      | Neutrophils,<br>Monocytes,<br>Macrophages | PE-Cy7, FITC, BV421      | RB6-8C5          | BD Biosciences              |
| CD11b                          | Macrophages, DCs                          | PE, PerCP-Cy5.5, APC     | M1/70            | BD Biosciences              |
| CD11c                          | DCs, Macrophages                          | PE, PE-Cy7, APC, APC-Cy7 | HL3              | BD Biosciences              |
| CD317                          | pDCs                                      | PE, APC                  | eBio129c,eBio927 | eBioscience                 |
| CD19                           | B-cells                                   | APC                      | 1D3              | BD Biosciences              |
| CD3e                           | T-cells                                   | PE-Cy7, APC-Cy7, APC     | 145-2C11         | eBioscience, BD Biosciences |
| CD8a                           | Killer T-cells                            | FITC, PerCP-Cy5.5, APC   | 53-6.7           | BD Biosciences              |
| CD4                            | Helper T-cells                            | PE-Cy7, APC, APC-Cy7     | GK1.5            | BD Biosciences, eBioscience |
| *Rabbit anti-N<br>RVFV antigen | RVFV virus particles                      | purified                 | IH918            | Institut Pasteur            |
| Anti-rabbit IgG                | -                                         | FITC, PE                 | -                | BD Biosciences              |
| Fixable viability              | Non-viable cells                          | eFluor 780               | -                | BD Biosciences              |
| *Caspase-3                     | Apoptotic cells                           | PE                       | C92.605          | BD Biosciences              |
| IFNAR1                         | Interferon alpha/beta<br>receptor         | PE                       | MAR1-5A3         | eBioscience                 |
| *IFN-gamma                     | Interferon -gamma                         | Alexa647                 | XMG1.2           | BD Biosciences              |
| CD162                          | PSGL-1                                    | PE, AlexaFlour 647       | 2PH1             | BD Biosciences              |

\*intracellular stain
